# Supplementary material for: Inferring the vertical distribution of CO and CO 2 from TCCON total column values using the TARDISS algorithm
Source: Copernicus journal article supplement (doi:10.5194/amt-16-2601-2023), 2023-05-30
Supplement: Supplementary file 1 [file amt-16-2601-2023-supplement.pdf]

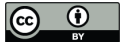

*Supplement of*

## **Inferring the vertical distribution of CO and CO<sub>2</sub> from TCCON total column values using the TARDISS algorithm**

**Harrison A. Parker et al.**

*Correspondence to:* Paul O. Wennberg ([wennberg@caltech.edu](mailto:wennberg@caltech.edu)) and Joshua L. Laughner ([josh.laughner@jpl.nasa.gov](mailto:josh.laughner@jpl.nasa.gov))

The copyright of individual parts of the supplement might differ from the article licence.

## Supplemental Information:

| Variable Name                     | Variable Description                                                          | Defining Equation |
|-----------------------------------|-------------------------------------------------------------------------------|-------------------|
| <b>A</b>                          | TARDISS temporal averaging kernel                                             | ~                 |
| $\mathbf{A}_{\text{vert}}$        | TARDISS sensitivity as it relates to the vertical profile                     | 22                |
| $\mathbf{a}_{\text{TCCON}}^{\xi}$ | TCCON column averaging kernel vector dotted with an integration operator      | ~                 |
| $\mathbf{a}_{\text{TCCON}}$       | TCCON column averaging kernel vector                                          | ~                 |
| $\chi$                            | Cost of retrieval                                                             | 1                 |
| <b>G</b>                          | Gain matrix of temporal retrieval                                             | 21                |
| DoF                               | Degrees of Freedom of signal                                                  | 18                |
| $\gamma_L$                        | Lower partial column scalar                                                   | ~                 |
| $\gamma_U$                        | Upper partial column scalar                                                   | ~                 |
| $\gamma_{a,L}$                    | A priori lower partial column scalar                                          | ~                 |
| $\gamma_{a,U}$                    | A priori upper partial column scalar                                          | ~                 |
| H                                 | Shannon information content                                                   | 19                |
| <b>I</b>                          | Identity matrix                                                               | ~                 |
| i                                 | Index value                                                                   | ~                 |
| <b>K</b>                          | TARDISS Jacobian matrix                                                       | 12                |
| $k_L$                             | Lower partial column TARDISS Jacobian element for one window for one spectrum | 8                 |
| $k_U$                             | Upper partial column TARDISS Jacobian element for one window for one spectrum | 9                 |
| $n_l$                             | Number of levels in a vertical profile                                        | ~                 |
| $n_s$                             | Number of TCCON spectral measurements in a day                                | ~                 |
| $n_w$                             | Number of TCCON windows used in the TARDISS retrieval                         | ~                 |
| q                                 | Index of the top of the lower partial column part of the profile              | ~                 |
| $\mathbf{S}_a$                    | A priori covariance matrix                                                    | ~                 |
| $\mathbf{S}_{\epsilon}$           | Model covariance matrix                                                       | ~                 |

|                           |                                                                                                                   |        |
|---------------------------|-------------------------------------------------------------------------------------------------------------------|--------|
| $\mathbf{S}_r$            | Retrieval noise matrix                                                                                            | 26     |
| $\mathbf{S}_s$            | Smoothing error matrix                                                                                            | 25     |
| $\sigma$                  | TARDISS retrieval errors                                                                                          | ~      |
| $VEM$                     | Validation Error Multiplier                                                                                       | 27     |
| $\mathbf{x}_{a,\gamma}$   | Vector of a priori partial column scalar values                                                                   | 14     |
| $x_{a,TCCON}$             | TCCON a priori profile times median of TCCON VSFs for one measurement                                             | ~      |
| $\hat{\mathbf{x}}_\gamma$ | Retrieved state vector of partial column scalar values                                                            | 16     |
| $\hat{x}_{\gamma L}$      | Lower partial column element of the retrieved state vector                                                        | ~      |
| $\hat{x}_{\gamma U}$      | Upper partial column element of the retrieved state vector                                                        | ~      |
| $\mathbf{x}_\gamma$       | Theoretical state vector of partial column scalar values                                                          | 13     |
| $\mathbf{x}_{L2}$         | Vector of partial column scalar values calculated via the least squares method                                    | 15     |
| $\mathbf{x}_{part}$       | A posteriori profile                                                                                              | 2      |
| $\mathbf{x}_{true}$       | In situ measured profile                                                                                          | ~      |
| $\mathbf{y}$              | Measurement vector with elements defined by<br>$z_{TCCON} - z_{a,TCCON}$                                          | 10, 11 |
| $\mathbf{E}_{TCCON}$      | Matrix of TCCON column averaging kernels for each window and each spectrum within a day                           | 23     |
| $z_{TCCON}$               | TCCON column average mole fraction value for one window and one spectrum                                          | 3      |
| $z_{a,TCCON}$             | TCCON a priori column average mole fraction times the median VSF of the windows used                              | ~      |
| $z_{a,L,TCCON}$           | Lower partial column of TCCON a priori column average mole fraction times the median VSF of the windows used      | ~      |
| $z_{a,U,TCCON}$           | Upper partial column of TCCON a priori column average mole fraction times the median VSF of the windows used      | ~      |
| $\hat{\mathbf{z}}_{comp}$ | Vector of partial column mole fractions used for comparison to the smoothed column averaged in situ mole fraction | ~      |
| $\mathbf{z}_{PC}$         | Vector of reconstructed partial column mole fraction values for a day of measurement                              | 17     |
| $z_{PC,L}$                | Lower partial column element of the reconstructed partial column mole fraction vector                             | ~      |
| $z_{PC,U}$                | Upper partial column element of the reconstructed partial column mole fraction vector                             | ~      |
| $\hat{z}_s$               | Smoothed column or partial column averaged in situ mole fraction                                                  | 20, 24 |

**Table S1.** Table of variable names, descriptions, and defining equation for all the variables used in the work.

## 5 S1 Temporal Assimilation

To test the influence of the number of observations included in each TARDISS retrieval, we compare the retrieved error value for each individual retrieval and with an increasing number of observations until we use the full day of observations. In this test, we take the midday observation from the Park Falls site on July 18, 2018 and retrieve the partial column error values using the least squares method and the maximum a posteriori method (using a static ideal a priori scalar to avoid influences from the least squares approach). These values are represented by the points that correspond with zero on the x axis of Fig. S1 for both the lower and upper partial column errors. We then retrieve the errors of the midday measurement again including the observation before and after it which is represented by the points that correspond with 2 on the x axis of Fig. S1. We repeat this method, expanding the number of observations included until we use the entire day of observations.

The left-hand plot of Fig. S1 shows the decrease of the retrieved upper and lower partial column error of the midday point as the number of observations included in the retrieval increases. The upper partial column errors decrease more than the lower partial column errors partially due to the temporal constraints of the a priori covariance matrix. In contrast, the right-hand plot of Fig. S1 shows that the inclusion of more observations in the least squares fit does not change the retrieved partial column errors of the midday measurement. Moreover, the partial column errors retrieved using the least squares method are at least eight times larger than the partial column errors retrieved using the MAP method. This is due to the use the a priori covariance matrix in the MAP method that can improve upon the best estimate retrieval of the least squares method.

To understand the influence of the a priori covariance matrix (overall scaling and temporal constraints), we compare the error values of the least squares method with the MAP method with an entirely uninformed a priori covariance matrix. Shown in Fig. S2, the uninformed MAP approach returns errors of similar magnitude to the least squares method. This suggests that a main value of the MAP approach is the use of constraints and external information to improve and inform the retrieval.

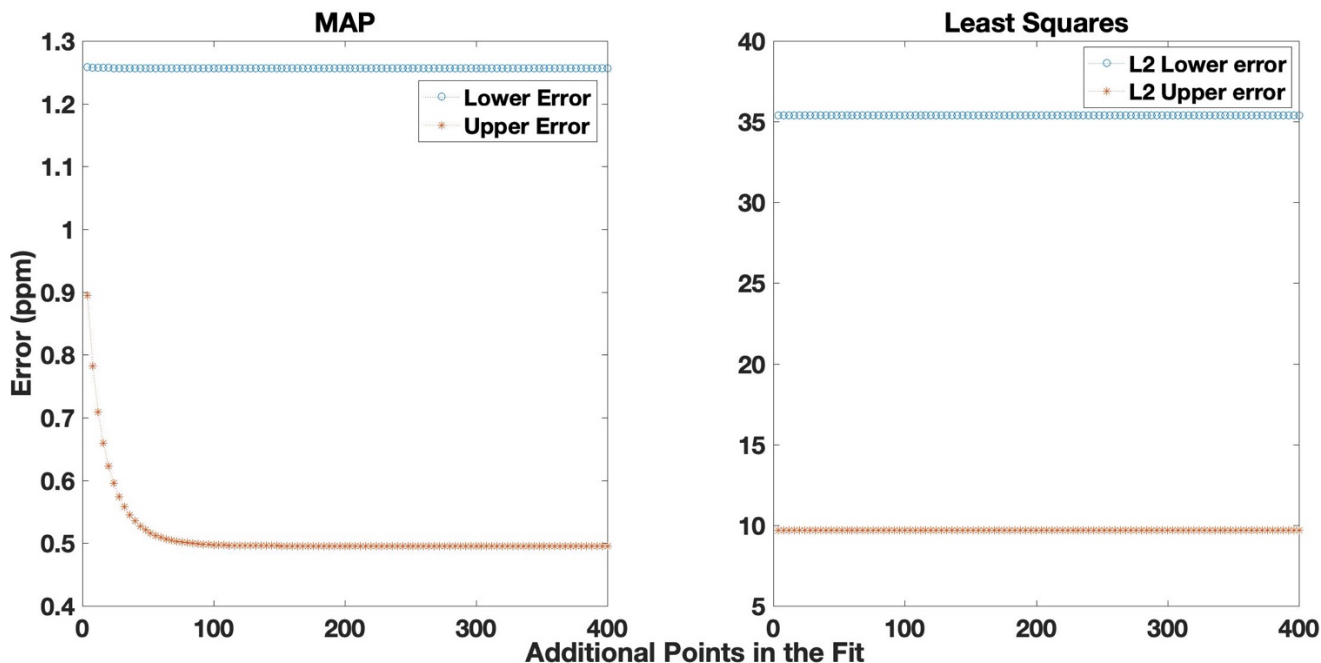

30

**Figure S1.** Errors in the retrieval of CO<sub>2</sub> from the midday total column measurement at the Park Falls site on July 18, 2018 using the MAP method outlined by Equation 13 and the least squares method outlined by Equation 12. The blue circles represent the error in the lower partial column and the orange asterisks represent the error in the upper partial column. Note the difference in the range of the y axis in the left and right plots both of which are in parts per million. The x axis indicates the number of points included in the overall fit with zero additional points representing the retrieval of a single spectrum.

35

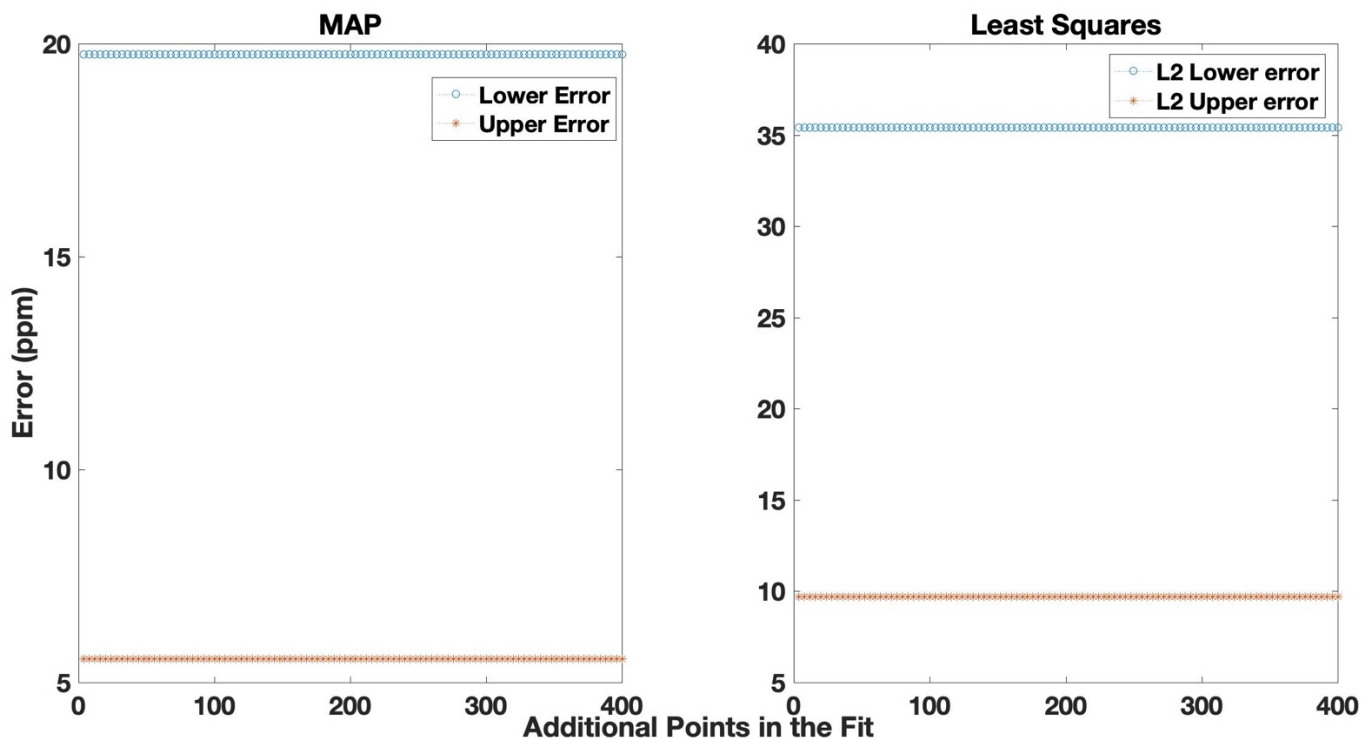

**Figure S2.** Same as Fig. S1, except the a priori covariance is removed from the MAP retrieval.

40

| Site       | Type     | Species         | Campaign/<br>Program | Data Availability                                                                           | Dates                | Altitudes    |
|------------|----------|-----------------|----------------------|---------------------------------------------------------------------------------------------|----------------------|--------------|
| Park Falls | Aircraft | CO <sub>2</sub> | ATom                 | <a href="https://doi.org/10.3334/ORN LDAAC/1925">https://doi.org/10.3334/ORN LDAAC/1925</a> | 20160822             | 0.79 - 12 km |
|            | AirCore  | CO <sub>2</sub> | NOAA<br>AirCore      | <a href="https://doi.org/10.15138/6A V0-MY81">https://doi.org/10.15138/6A V0-MY81</a>       | 20180730<br>20180731 | Surf. – 21km |
| Armstrong  | Aircraft | CO <sub>2</sub> | SEAC4RS              | <a href="https://doi.org/10.3334/ORN LDAAC/1925">https://doi.org/10.3334/ORN LDAAC/1925</a> | 20130923             | 1.5 - 19 km  |
| Armstrong  | Aircraft | CO <sub>2</sub> | ATom                 | <a href="https://doi.org/10.3334/ORN LDAAC/1925">https://doi.org/10.3334/ORN LDAAC/1925</a> | 20140820             | 0.79 - 12 km |

|                 |          |                      |                             |                                                                                                       |                                              |                                |
|-----------------|----------|----------------------|-----------------------------|-------------------------------------------------------------------------------------------------------|----------------------------------------------|--------------------------------|
| Armstrong       | Aircraft | CO <sub>2</sub>      | GSFC                        | <a href="https://doi.org/10.25925/20190319">https://doi.org/10.25925/20190319</a>                     | 20140820<br>20140822<br>20151002<br>20160210 | 0.6 - 13 km                    |
| Armstrong       | Aircraft | CO <sub>2</sub>      | KORUS-AQ                    | <a href="https://doi.org/10.1525/elementa.2020.00163">https://doi.org/10.1525/elementa.2020.00163</a> | 20160618                                     | 0.68 - 12 km                   |
| Armstrong       | AirCore  | CO <sub>2</sub>      | NOAA AirCore                | <a href="https://doi.org/10.15138/6AV0-MY81">https://doi.org/10.15138/6AV0-MY81</a>                   | 20180716<br>20180717<br>20180718             | Surf. – 21 km                  |
| Lamont          | AirCore  | CO <sub>2</sub> , CO | NOAA AirCore                | <a href="https://doi.org/10.15138/6AV0-MY81">https://doi.org/10.15138/6AV0-MY81</a>                   | 20180723<br>20180725<br>20180727             | Surf. – 21 km<br>Surf. – 17 km |
| Lamont          | Aircraft | CO <sub>2</sub> , CO | NOAA GGGRN aircraft program | <a href="https://doi.org/10.1002/2014JD022591">https://doi.org/10.1002/2014JD022591</a> , 2015.       | 2008 - 2018                                  | 0.17 - 6 km                    |
| East Trout Lake | Aircraft | CO <sub>2</sub> , CO | NOAA GGGRN aircraft program | <a href="https://doi.org/10.1002/2014JD022591">https://doi.org/10.1002/2014JD022591</a> , 2015.       | 2017 - 2020                                  | 0.17 - 7 km                    |

**Table S2.** Site, measurement type, species, campaign or program, citation, and dates of the in situ profile data used in this work.

45

| TCCON Window (cm <sup>-1</sup> ) | Total Column Validation Slope | Total Column Validation Slope Error | Total Column Mean Ratio Deviation |
|----------------------------------|-------------------------------|-------------------------------------|-----------------------------------|
| <b>CO<sub>2</sub></b>            |                               |                                     |                                   |
| 6220                             | 1.007                         | 0.001                               | 0.001                             |
| 6339                             | 1.004                         | 0.001                               | 0.002                             |
| 6073                             | 1.006                         | 0.001                               | 0.001                             |
| 4852                             | 1.006                         | 0.001                               | 0.003                             |

|                         |       |        |       |
|-------------------------|-------|--------|-------|
| TARDISS CO <sub>2</sub> | 1.000 | 0.0004 | 0.001 |
| <b>CO</b>               |       |        |       |
| 4290                    | 1.009 | 0.055  | 0.056 |
| 2160                    | 1.033 | 0.020  | 0.041 |
| 2111                    | 1.053 | 0.020  | 0.052 |
| TARDISS CO              | 1.047 | 0.019  | 0.052 |

50 **Table S3.** Comparisons of the TARDISS total column retrieval to the total column comparisons of the fits of the TCCON spectral windows used as input for the TARDISS algorithm. The data in the TARDISS row uses the operational parameters for the fit that are identified in Table 2 and 3 by an asterisk.

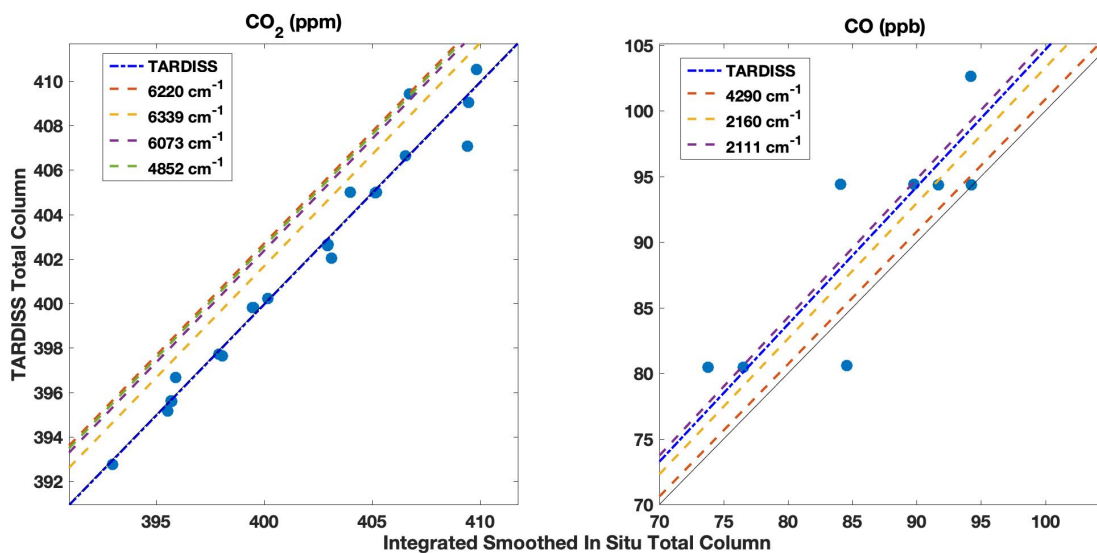

55 **Figure S3.** The direct comparisons between the total column DMF values retrieved from the TARDISS fit and the integrated, smoothed in situ partial columns for CO<sub>2</sub> (left) and the CO (right). The black solid line is the 1-1 line and the blue dot-dash line is the linear fit of the data with the y-intercept forced through zero. The slopes of the partial column validation of the TCCON spectral windows used in the retrieval are represented by dashed lines.

60

| Site            | Long Term Total Degrees of Freedom per Measurement | Long Term Comparison Slope | Lower partial column VEM from long-term data | Long term VEM total lower partial column error (ppm for CO <sub>2</sub> ; ppb for CO) |
|-----------------|----------------------------------------------------|----------------------------|----------------------------------------------|---------------------------------------------------------------------------------------|
| CO <sub>2</sub> |                                                    |                            |                                              |                                                                                       |



|                 |        |       |      |      |
|-----------------|--------|-------|------|------|
| Lamont          | 0.0473 | 1.002 | 1.00 | 1.23 |
| East Trout Lake | 0.0543 | 1.001 | 1.30 | 1.64 |
| <b>CO</b>       |        |       |      |      |
| Lamont          | 0.144  | 1.000 | 1.00 | 1.18 |
| East Trout Lake | 0.155  | 0.945 | 6.97 | 8.14 |

**Table S4.** DoF, comparison slopes, VEM, and total errors in the CO and CO<sub>2</sub> lower partial column retrievals for the long term comparisons performed at the Lamont and East Trout Lake sites. The values for total retrieval error and total error represent one standard deviation.

65

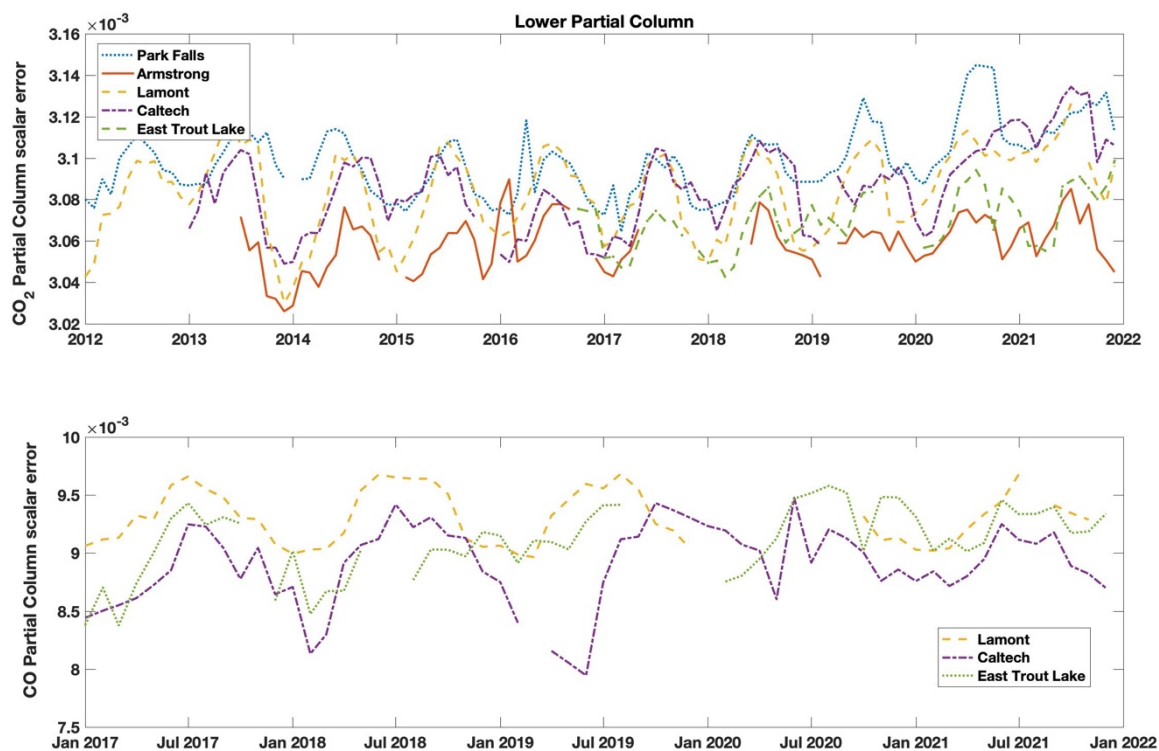

**Figure S4.** Monthly mean lower partial column scalar errors plotted for CO<sub>2</sub> (top) and CO (bottom).

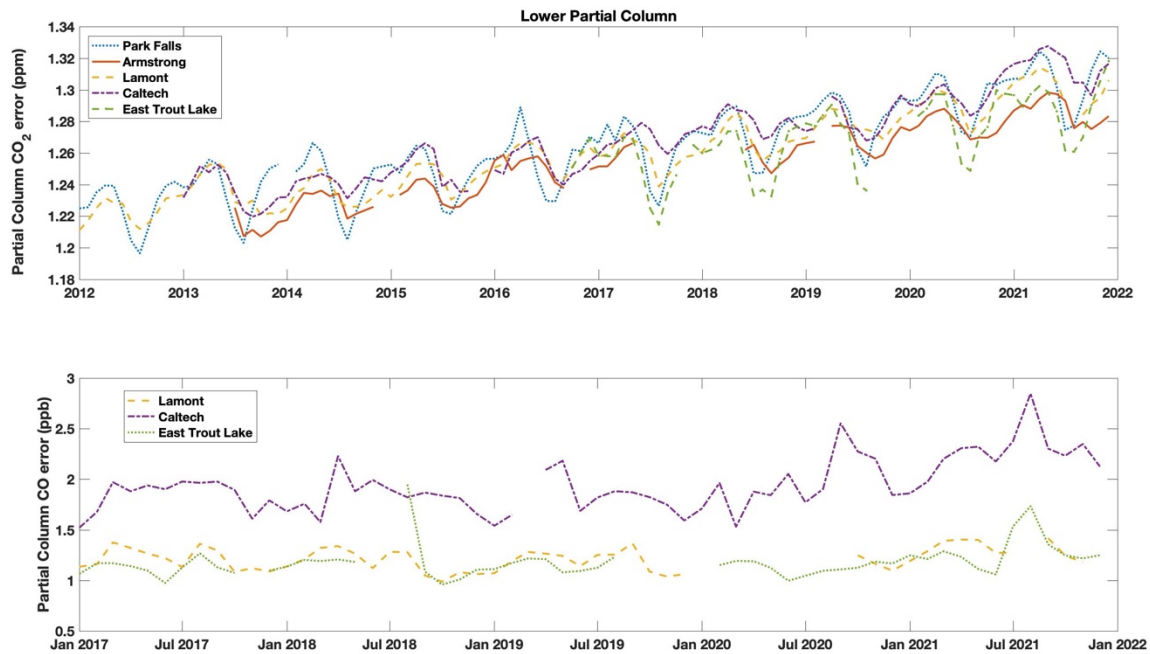

70 **Figure S5.** Monthly mean lower partial column errors plotted for CO<sub>2</sub> in ppm (top) and CO in ppb (bottom).

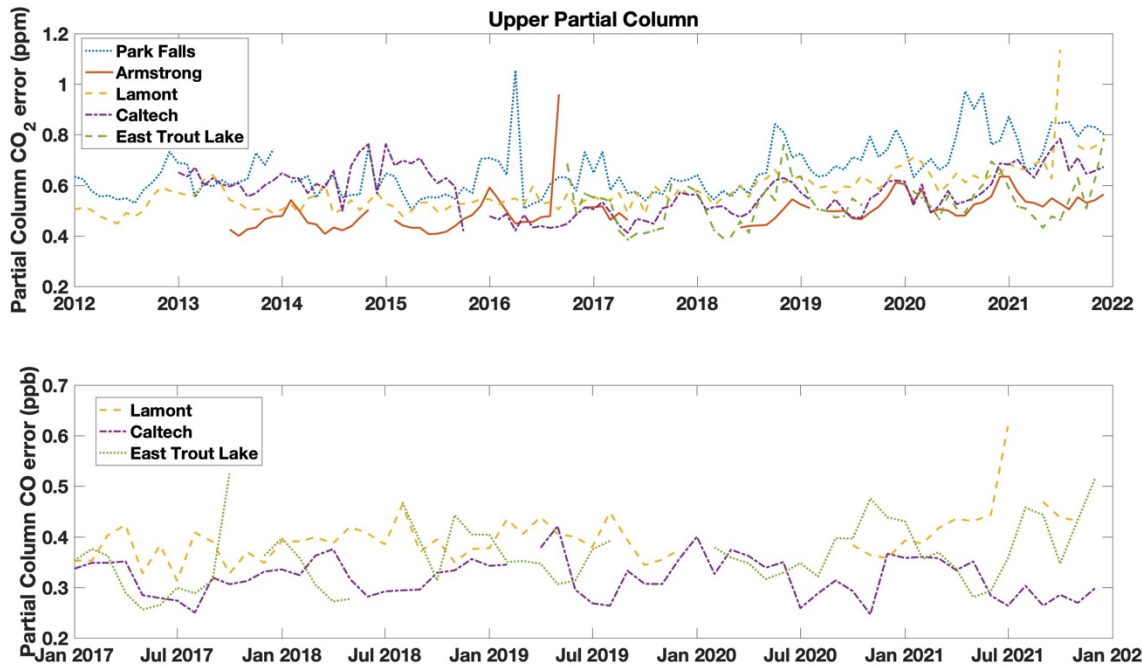

75 **Figure S6.** Monthly mean upper partial column errors plotted for CO<sub>2</sub> in ppm (top) and CO in ppb (bottom).

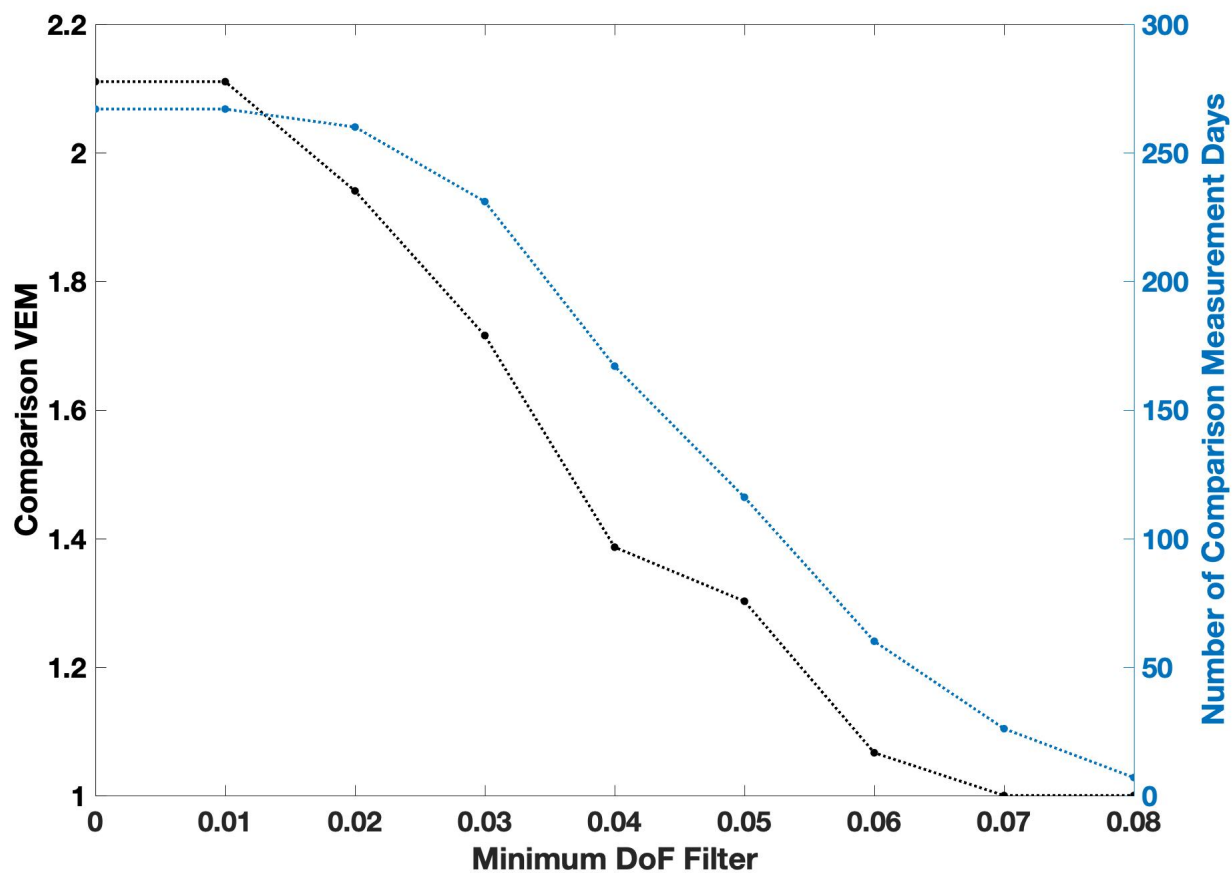

80 **Figure S7.** Comparison Validation Error Multiplier (VEM) and number of comparison days plotted by the minimum DoF per measurement filter applied to the comparison data. The retrieved data is in comparison with in situ data measured as a part of the NOAA GGGRN (Global Greenhouse Gas Reference Network) Aircraft sites from 2008 -2018 at the Lamont measurement site.

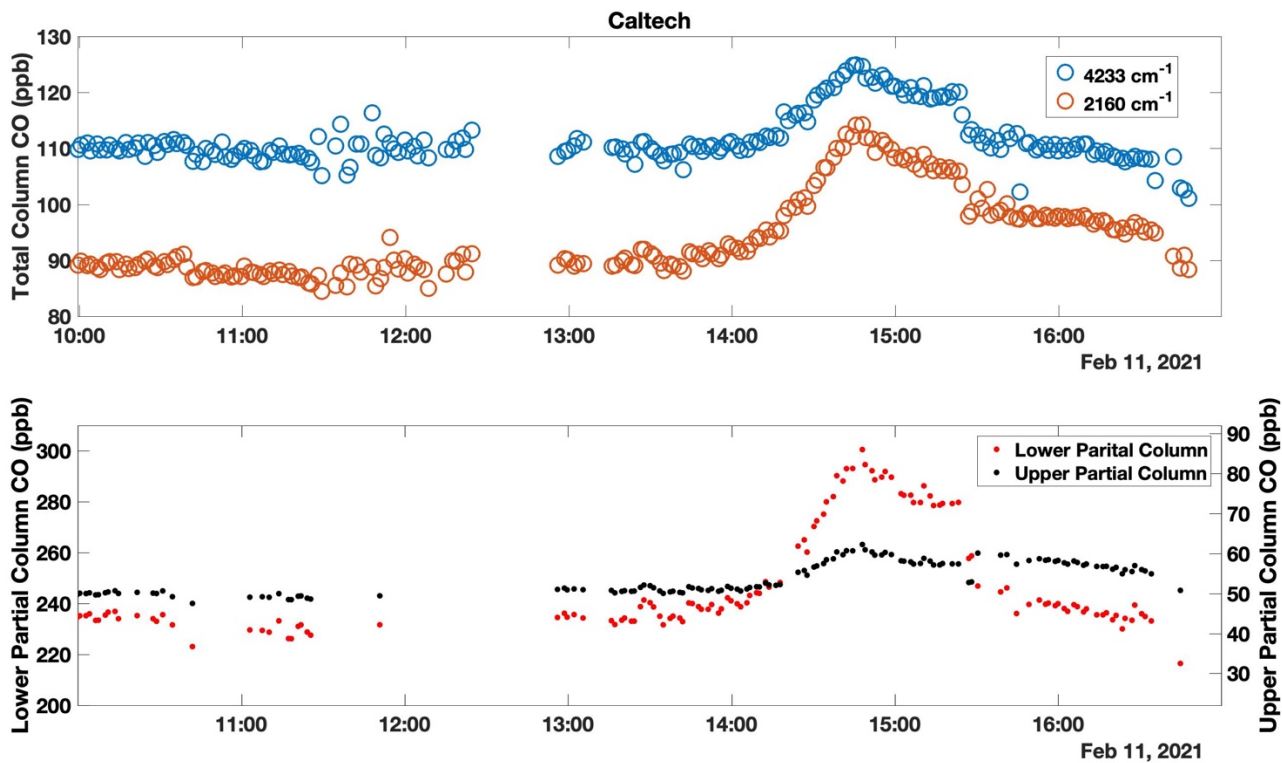

85 **Figure S8.** Example of one day of TCCON retrievals of total column CO (top) from two different spectral windows (4233 in blue and 2160 in orange) above the TARDISS partial column retrievals for CO (lower partial column in red dots, upper partial column in black dots) for the same day (bottom).
